# Supplementary material for: Shifts in ophthalmic care utilization during the COVID-19 pandemic in the US
Source: PubMed Central journal article supplement (PMC10721809; doi:10.1038/s43856-023-00416-4), 2023-12-14
Supplement: 43856_2023_416_MOESM7_ESM.pdf [file 43856_2023_416_MOESM7_ESM.pdf]

## Description of Additional Supplementary Files

**File Name:** Supplementary Data 1

**Description:** Inventory and ICD-10 crosswalk of all 336 diagnosis entities considered for inclusion

**File Name:** Supplementary Data 2

**Description:** Counterfactual model performance metrics and other summary statistics for all 336 diagnosis entities considered for inclusion

**File Name:** Supplementary Data 3

**Description:** Point estimates, p-values (unadjusted and adjusted), and 95% confidence intervals of monthly deviations for all 261 diagnosis entities included for analysis

**File Name:** Supplementary Data 4

**Description:** Source data for the main figures in this paper
